# Supplementary material for: Association between smoking and in-hospital mortality in patients with acute myocardial infarction: results from a prospective, multicentre, observational study in China
Source: PubMed Central journal article supplement — BMJ Open. 2019 Aug 30;9(8):e030252. doi: 10.1136/bmjopen-2019-030252 (PMC6720553; doi:10.1136/bmjopen-2019-030252), 2019-08-30
Supplement: bmjopen-2019-030252.reviewer_comments.pdf [file bmjopen-2019-030252.reviewer_comments.pdf]

## PEER REVIEW HISTORY

BMJ Open publishes all reviews undertaken for accepted manuscripts. Reviewers are asked to complete a checklist review form (<http://bmjopen.bmj.com/site/about/resources/checklist.pdf>) and are provided with free text boxes to elaborate on their assessment. These free text comments are reproduced below.

### ARTICLE DETAILS

|                            |                                                                                                                                                                           |
|----------------------------|---------------------------------------------------------------------------------------------------------------------------------------------------------------------------|
| <b>TITLE (PROVISIONAL)</b> | Association between smoking and in-hospital mortality in patients with acute myocardial infarction: results from a prospective, multicenter, observational study in China |
| <b>AUTHORS</b>             | Song, Chenxi; Fu, Rui; Dou, Kefei; Yang, Jingang; Xu, Haiyan; Gao, Xiaojin; Wang, Hao; Liu, Shuai; Fan, Xiaoxue; Yang, Yuejin                                             |

### VERSION 1 – REVIEW

|                        |                                                                                     |
|------------------------|-------------------------------------------------------------------------------------|
| <b>REVIEWER</b>        | Dragana Radovanovic<br>AMIS Plus Data Center<br>University of Zurich<br>Switzerland |
| <b>REVIEW RETURNED</b> | 09-Apr-2019                                                                         |

|                         |                                                                                                                                                                                                                                                                                                                                                                                                                                                                                                                                                                                                                                                                                                                                                                                                                                                                                                                                                                                                                                                                                                                                                                                                                                                                                                                                                                                                                  |
|-------------------------|------------------------------------------------------------------------------------------------------------------------------------------------------------------------------------------------------------------------------------------------------------------------------------------------------------------------------------------------------------------------------------------------------------------------------------------------------------------------------------------------------------------------------------------------------------------------------------------------------------------------------------------------------------------------------------------------------------------------------------------------------------------------------------------------------------------------------------------------------------------------------------------------------------------------------------------------------------------------------------------------------------------------------------------------------------------------------------------------------------------------------------------------------------------------------------------------------------------------------------------------------------------------------------------------------------------------------------------------------------------------------------------------------------------|
| <b>GENERAL COMMENTS</b> | <p>This paper by Song C. et al. reports lower in-hospital mortality among AMI patients who smoke compared to non-smokers even after adjustment for several confounders. The paper addresses an interesting topic and has the strength that 37,614 patients from a broad geographic region in China could be included.</p> <p>However, I have some comments and questions which should be addressed. The paper should also be checked by a native English speaker.</p> <p>General comments:</p> <ul style="list-style-type: none"><li>- From the baseline characteristics, before and after matching, it is not clear whether there are differences between the smoking groups regarding immediate treatment such as PCI and the use of P2Y12 inhibitors which could have a great impact on mortality. Although PCI is included in the multivariable analysis please show the differences between the three groups.</li><li>- Systolic blood pressure, heart rate, creatinine, haemoglobin and the GRACEe risk score are also not shown in the baseline characteristics. How were these variables used for matching? As binary variables? If yes, what were the cut offs?</li></ul> <p>Minor comments:</p> <ul style="list-style-type: none"><li>- Page 2, line 58: Cox regression should be logistic regression.</li><li>- Page 4, line 29: Please list the comorbidities and risk factors separately.</li></ul> |
|-------------------------|------------------------------------------------------------------------------------------------------------------------------------------------------------------------------------------------------------------------------------------------------------------------------------------------------------------------------------------------------------------------------------------------------------------------------------------------------------------------------------------------------------------------------------------------------------------------------------------------------------------------------------------------------------------------------------------------------------------------------------------------------------------------------------------------------------------------------------------------------------------------------------------------------------------------------------------------------------------------------------------------------------------------------------------------------------------------------------------------------------------------------------------------------------------------------------------------------------------------------------------------------------------------------------------------------------------------------------------------------------------------------------------------------------------|

|  |                                                                                                                                                                                                                                                                                                                                                                                                                                                                                                                                                                                                                                                                                                                                                                                                                                                                                                                                                                                                                                                                                                                                                                                                                                                                                                     |
|--|-----------------------------------------------------------------------------------------------------------------------------------------------------------------------------------------------------------------------------------------------------------------------------------------------------------------------------------------------------------------------------------------------------------------------------------------------------------------------------------------------------------------------------------------------------------------------------------------------------------------------------------------------------------------------------------------------------------------------------------------------------------------------------------------------------------------------------------------------------------------------------------------------------------------------------------------------------------------------------------------------------------------------------------------------------------------------------------------------------------------------------------------------------------------------------------------------------------------------------------------------------------------------------------------------------|
|  | <ul style="list-style-type: none"> <li>- On page 5, line 18: Please define here which “two groups” were compared and not first in the following paragraph.</li> <li>- The same abbreviation (SD) is used for standard deviation and standardized difference. Please correct.</li> <li>- For the categorical variables, only the percentages are presented in the baseline characteristics table although you write in the methods that you present counts and frequencies. What is the proportion of missing data for the single variables? I would suggest presenting the data as counts vs. total number of available data and frequencies for better transparency unless there are no missing data for all variables.</li> <li>- Page 5, line 57: for better readability, instead of repeating the variables included in the model you could simply write that you used the same variables as for the matching.</li> <li>- Page 7: I would suggest switching the paragraphs “Propensity score matching” and “in-hospital mortality” as it is more logical to start with the description of unadjusted results.</li> <li>- Table 2: Please indicate the number of patients included in the adjusted model.</li> <li>- The sentence on page 9, lines 23-28 is redundant. Please delete.</li> </ul> |
|--|-----------------------------------------------------------------------------------------------------------------------------------------------------------------------------------------------------------------------------------------------------------------------------------------------------------------------------------------------------------------------------------------------------------------------------------------------------------------------------------------------------------------------------------------------------------------------------------------------------------------------------------------------------------------------------------------------------------------------------------------------------------------------------------------------------------------------------------------------------------------------------------------------------------------------------------------------------------------------------------------------------------------------------------------------------------------------------------------------------------------------------------------------------------------------------------------------------------------------------------------------------------------------------------------------------|

|                        |                                                |
|------------------------|------------------------------------------------|
| <b>REVIEWER</b>        | Mark Rutherford<br>University of Leicester, UK |
| <b>REVIEW RETURNED</b> | 29-Apr-2019                                    |

|                         |                                                                                                                                                                                                                                                                                                                                                                                                                                                                                                                                                                                                                                                                                                                                                                                                                                                                                                                                                                                                                                                                                                                                                                                                                                                                      |
|-------------------------|----------------------------------------------------------------------------------------------------------------------------------------------------------------------------------------------------------------------------------------------------------------------------------------------------------------------------------------------------------------------------------------------------------------------------------------------------------------------------------------------------------------------------------------------------------------------------------------------------------------------------------------------------------------------------------------------------------------------------------------------------------------------------------------------------------------------------------------------------------------------------------------------------------------------------------------------------------------------------------------------------------------------------------------------------------------------------------------------------------------------------------------------------------------------------------------------------------------------------------------------------------------------|
| <b>GENERAL COMMENTS</b> | <p><b>Introduction</b><br/>Why did you hypothesise initially that smokers have lower in hospital mortality? What was the a-priori justification for it? The introduction needs more details to evidence this hypothesis.</p> <p>As an aside, I’m not sure I also fully follow the clinical utility of knowing this either even if there is evidence of a true effect - again some motivation here would be of interest in the introduction. Hardly a good public health approach to promote smoking to prevent in-hospital mortality following an MI, is it? when it could well be smoking and other lifestyle factors that caused the MI in the first place.</p> <p><b>Methods</b><br/>I encourage the authors to look further into the literature on Index event bias.<br/><a href="https://www.onlinecjc.ca/article/S0828-282X(18)30244-7/pdf">https://www.onlinecjc.ca/article/S0828-282X(18)30244-7/pdf</a> and then reflect on this in how the study is conducted and interpreted.</p> <p>There are broad categorisations used in the paper: Current smokers –very broad, ex-smokers - very broad. Did you further categorise to check if results still held?</p> <p>All-cause death – have you further compared the rates of varying causes of mortality?</p> |
|-------------------------|----------------------------------------------------------------------------------------------------------------------------------------------------------------------------------------------------------------------------------------------------------------------------------------------------------------------------------------------------------------------------------------------------------------------------------------------------------------------------------------------------------------------------------------------------------------------------------------------------------------------------------------------------------------------------------------------------------------------------------------------------------------------------------------------------------------------------------------------------------------------------------------------------------------------------------------------------------------------------------------------------------------------------------------------------------------------------------------------------------------------------------------------------------------------------------------------------------------------------------------------------------------------|

|  |                                                                                                                                                                                                                                                                                                                                                                                                                                                                                                                                                                                                                                  |
|--|----------------------------------------------------------------------------------------------------------------------------------------------------------------------------------------------------------------------------------------------------------------------------------------------------------------------------------------------------------------------------------------------------------------------------------------------------------------------------------------------------------------------------------------------------------------------------------------------------------------------------------|
|  | <p>More details are needed on how things were modelled – my guess is that a poor model or the index event bias highlighted above are the reasons for the persisting association.</p> <p>The authors mention "appropriate missing data methods" in the last line of the methods. Such as? What was actually done in this regard?</p> <p>Discussion - Interpretation of our results: section.</p> <p>Precision has a specific statistical meaning – be careful with wording, not sure you are referring here to precision as such here.</p> <p>Throughout - there needs to be some changes in the English for further clarity.</p> |
|--|----------------------------------------------------------------------------------------------------------------------------------------------------------------------------------------------------------------------------------------------------------------------------------------------------------------------------------------------------------------------------------------------------------------------------------------------------------------------------------------------------------------------------------------------------------------------------------------------------------------------------------|

### VERSION 1 – AUTHOR RESPONSE

Reviewer: 1

Reviewer Name: Dragana Radovanovic

Institution and Country: AMIS Plus Data Center - University of Zurich - Switzerland

Please state any competing interests or state 'None declared': Non declared

Please leave your comments for the authors below

This paper by Song C. et al. reports lower in-hospital mortality among AMI patients who smoke compared to non-smokers even after adjustment for several confounders. The paper addresses an interesting topic and has the strength that 37,614 patients from a broad geographic region in China could be included.

However, I have some comments and questions which should be addressed. The paper should also be checked by a native English speaker.

General comments:

- From the baseline characteristics, before and after matching, it is not clear whether there are differences between the smoking groups regarding immediate treatment such as PCI and the use of P2Y12 inhibitors which could have a great impact on mortality. Although PCI is included in the multivariable analysis please show the differences between the three groups.

Re: Thank you for your comments. We have compared the use of PCI and P2Y12 inhibitors across smoking groups as follows, we also added this part in the revised tables.

Table 1 Baseline characteristics according to smoking status (before matching)

| Variable         | Current Smokers<br>(N=16664) | Ex-smokers<br>(N=4253) | Non-smokers<br>(N=16697) | p value |
|------------------|------------------------------|------------------------|--------------------------|---------|
| Primary PCI      | 8499/16544<br>(51.4%)        | 1566/4224<br>(37.1%)   | 6369/16579<br>(38.4%)    | 0.1084  |
| P2Y12 inhibitors | 16086/16458<br>(97.7%)       | 4030/4186<br>(96.3%)   | 15837/16446<br>(96.3%)   | 0.9423  |
| SBP(mmHg)        | 127.82 ±24.69                | 129.71 ±25.17          | 130.58 ±25.97            | <0.0001 |

|                   |               |               |               |         |
|-------------------|---------------|---------------|---------------|---------|
| Heart rate (bpm)  | 76.74 ±17.40  | 79.85 ±19.82  | 79.47 ±18.89  | <0.0001 |
| Hb (g/L)          | 142.15 ±17.42 | 135.38 ±19.39 | 130.18 ±19.43 | <0.0001 |
| Creatinine (mg/L) | 37.40 ±0.69   | 37.40 ±0.46   | 37.42 ±2.04   | 0.1842  |
| GRACE risk score  | 151.43 ±33.02 | 171.34 ±35.63 | 169.61 ±35.89 | <0.0001 |

SBP: systolic blood pressure; Hb: hemoglobin

Supplementary Table 1 Baseline characteristics between current smokers vs. non-smokers (After matching)

| Variable          | Current Smokers (N=8552) | Non-smokers (N=8552) | p value | SD     |
|-------------------|--------------------------|----------------------|---------|--------|
| Primary PCI       | 3778 /8552 (44.2%)       | 3858/8552 (42.3%)    | 0.1966  | 0.0188 |
| P2Y12 inhibitors  | 7880/8552 (92.1%)        | 7912/8552 (92.5%)    | 0.3576  | 0.0141 |
| SBP(mmHg)         | 129.01 ±25.75            | 128.90 ±24.68        | 0.7767  | 0.0043 |
| Heart rate(bpm)   | 77.88 ±18.55             | 77.61 ±17.40         | 0.3279  | 0.0147 |
| Hb (g/L)          | 137.32 ±18.04            | 137.46 ±18.20        | 0.5606  | 0.0076 |
| Creatinine (mg/L) | 37.40 ±0.59              | 37.40 ±1.13          | 0.9837  | 0.0003 |
| GRACE risk score  | 161.33 ±34.18            | 161.31 ±34.22        | 0.9460  | 0.0008 |

SBP: systolic blood pressure; Hb: hemoglobin

Supplementary Table 2 Baseline characteristics between ex-smokers vs. non-smokers (After matching)

| Variable          | Ex-smokers (N=4142) | Non-smokers (N=4142) | p value | SD     |
|-------------------|---------------------|----------------------|---------|--------|
| Primary PCI       | 1541/4142 (37.2%)   | 1575/4142 (38.0%)    | 0.4060  | 0.0169 |
| P2Y12 inhibitors  | 3813/4142 (92.1%)   | 3842/4142 (92.8%)    | 0.2345  | 0.0264 |
| SBP(mmHg)         | 129.62 ±25.19       | 129.58 ±25.12        | 0.9422  | 0.0016 |
| Heart rate (bpm)  | 79.66 ±19.73        | 79.65 ±18.75         | 0.9679  | 0.0009 |
| Hb (g/L)          | 135.50 ±19.39       | 135.48 ±19.08        | 0.9618  | 0.0010 |
| Creatinine (mg/L) | 37.40 ±0.47         | 37.40 ±1.14          | 0.8868  | 0.0031 |
| GRACE risk score  | 170.68 ±35.39       | 169.90 ±36.56        | 0.2587  | 0.0215 |

SBP: systolic blood pressure; Hb: hemoglobin

- Systolic blood pressure, heart rate, creatinine, haemoglobin and the GRACEe risk score are also not shown in the baseline characteristics. How were these variables used for matching? As binary variables? If yes, what were the cut offs?

Re: Thank you for your comments. We have added systolic blood pressure, heart rate, creatinine, haemoglobin and the GRACE risk score in the tables above and also the revised tables. In addition, these variables were used as continuous variables for PS matching.

Minor comments:

- Page 2, line 58: Cox regression should be logistic regression.

Re: Thank you for your comments. We have replaced “cox regression” with “logistic regression”.

- Page 4, line 29: Please list the comorbidities and risk factors separately.

Re: Thank you for your comments. We have separated comorbidities and risk factors separately as follows:

“risk factors (hypertension, hyperlipidemia, diabetes), comorbidities (heart failure, peripheral vascular disease, stroke, chronic kidney disease, and chronic obstructive pulmonary disease [COPD]),”

- On page 5, line 18: Please define here which “two groups” were compared and not first in the following paragraph.

Re: Thank you for your comments. We defined here the “two groups” and removed the corresponding description in the following paragraph.

“Propensity score (PS) matching was used to control for baseline differences. We performed PS matching between current smokers and non-smokers, and between ex-smokers and non-smokers.”

- The same abbreviation (SD) is used for standard deviation and standardized difference. Please correct.

Re: Thank you for your comments. We spelled out the abbreviation for standardized difference in subsection “Statistical analysis”, and Supplementary Table 1 and Supplementary Table 2.

- For the categorical variables, only the percentages are presented in the baseline characteristics table although you write in the methods that you present counts and frequencies. What is the proportion of missing data for the single variables? I would suggest presenting the data as counts vs. total number of available data and frequencies for better transparency unless there are no missing data for all variables.

Re: Thank you for your comments. We have revised table 1, supplementary table 1 and supplementary table 2, and presented the data as “counts/total numbers available (frequencies)” for categorical variables.

- Page 5, line 57: for better readability, instead of repeating the variables included in the model you could simply write that you used the same variables as for the matching.

Re: Thank you for your comments. We have revised this part as follows:

“The stepwise selection method was used to compare in-hospital mortality across the different groups. Baseline characteristics that significantly differed across the groups and those of clinical importance were included in the model. These variables were the same as those used for propensity matching. A p value <0.1 was used as the entry criterion and a p value <0.05 was used as the removal criterion.”

- Page 7: I would suggest switching the paragraphs “Propensity score matching” and “in-hospital mortality” as it is more logical to start with the description of unadjusted results.

Re: Thank you for your comments. We have switched the two paragraphs.

- Table 2: Please indicate the number of patients included in the adjusted model.

Re: Thank you for your comments. The number of patients included in the adjusted model was 37614 and we have indicated the number as footnotes for table 2.

- The sentence on page 9, lines 23-28 is redundant. Please delete.

Re: Thank you for your comments. We have deleted lines 23-28.

Reviewer: 2

Reviewer Name: Mark Rutherford

Institution and Country: University of Leicester, UK

Please state any competing interests or state 'None declared': None declared.

Please leave your comments for the authors below

<b>Introduction</b>

Why did you hypothesise initially that smokers have lower in hospital mortality? What was the a-priori justification for it? The introduction needs more details to evidence this hypothesis.

Re: Thank you for your comments. We removed the hypothesis because we didn't have much robust evidence to support this hypothesis. In addition, we provided more details regarding the background and purpose of your study as follows:

"However, some previous studies have shown that smokers have a better outcome than do non-smokers following AMI. This phenomenon is referred to as "smoker's paradox". This phenomenon was first introduced in the 1970s, when Helmers found that smokers had a lower risk of mortality than did nonsmokers<sup>3</sup>. Some subsequent studies also showed smoker's paradox in patients with acute coronary syndrome<sup>4</sup>. This paradox may be explained by differences in baseline characteristics between smokers and non-smokers<sup>5</sup>. Additionally, the anti-platelet response may differ according to smoking status because of the effect of smoking on pharmacodynamics of clopidogrel therapy<sup>6</sup>. Notably, most studies regarding smoker's paradox were conducted in the era of thrombolysis, while the association between smoking and in-hospital mortality in patients who are treated with percutaneous intervention (PCI) remains controversial."

As an aside, I'm not sure I also fully follow the clinical utility of knowing this either even if there is evidence of a true effect - again some motivation here would be of interest in the introduction. Hardly a good public health approach to promote smoking to prevent in-hospital mortality following an MI, is it? when it could well be smoking and other lifestyle factors that caused the MI in the first place.

Re: Thank you for your comments. Our results should never be interpreted as encouraging patients to smoke. As described above and in the revised introduction, our motivation is to examine the true association between smoking and mortality. This is of clinical significance in terms of not only public health, but also implications for future studies.

The revised manuscript is as follows:

"Examining the true effect of smoking on outcome among contemporary patients with AMI is important. If smoker's paradox is explained by confounding and smoking is not associated with favorable outcomes, physicians should disseminate this message to patients and help them quit smoking. However, if smoker's paradox still exists in the contemporary era of PCI, the biochemical basis for this phenomenon should be investigated. This investigation may promote development of novel therapy for myocardial protection."

<b>Methods</b>

I encourage the authors to look further into the literature on Index event bias.

[https://www.onlinecjc.ca/article/S0828-282X\(18\)30244-7/pdf](https://www.onlinecjc.ca/article/S0828-282X(18)30244-7/pdf) and then reflect on this in how the study is conducted and interpreted.

Re: Thank you for your comments. We have read the editorial by Dr Christopher, which gave comments on the study conducted by Banack. In this study, Banack and colleagues used the method of inverse probability censoring weights (IPCWs) to correct for selection bias<sup>19</sup>. After reading this paper, we reflected on this regarding our study design and interpretation.

Study design:

Although we adjusted for known and measured confounders, our study may still subject to selection bias. First, we acknowledged our limitation that CAMI registry didn't collect data regarding patients died before hospitalization. So we were unable to use IPCWs to account for such selection bias. On the other hand, smoking is a well-known risk factor for first myocardial infarction (MI). Similarly, there are many other risk factors contributing to MI. Thus, if we select patients who already suffered AMI, those who never smoked may have a tendency towards more risk factors. Therefore, when we compared in-hospital mortality risk among smokers vs. non-smokers, we literally compared those with few vs. many risk factors, leading to the "smoker's paradox".

We added this part in "limitation section" as follows:

"Our study may have been subject to selection bias. The CAMI registry did not collect data on patients who died before hospitalization. Failing to account for pre-hospital deaths may have led to selection bias. The distribution of risk factors was significantly different between smokers and non-smokers. Although we adjusted for known and measured variables, there are likely to be other unmeasured variables leading to selection bias."

Study interpretation:

Our results should be interpreted with caution. On the one hand, although we adjust many common confounders, our study was still subject to selection bias as discussed above. On the other hand, our results shouldn't be interpreted as encouraging patients to smoke. Instead, the results indicated potential mechanisms underlying the protective effect of smoking, and future studies may explore novel therapies to protect myocardium by targeting the relevant pathways.

We also revised the corresponding "interpretation of our results" part.

There are broad categorisations used in the paper: Current smokers –very broad, ex-smokers - very broad. Did you further categorise to check if results still held?

Re : Thank you for your comments. CAMI registry didn't collect data regarding details of smoking status. We acknowledged this in "limitation" section. However, our definition was in accordance with most literatures regarding "smoker's paradox"<sup>20-22</sup>. The corresponding revised manuscript are as follows:

"accuracy of data still depends greatly on the expertise of local investigators. The CAMI registry didn't collect detailed data regarding smoking status. Smoking status might"

All-cause death – have you further compared the rates of varying causes of mortality?

Re : Thank you for your comments. We have further compared the rates of varying causes of mortality. In general, the rate of any cause of mortality was lowest in smokers, following ex-smokers and non-smokers. The difference achieved significance in "sudden cardiac death". We have also added this part in supplementary table 3 as follows.

Supplementary table 1 Causes of mortality according to smoking status

| Variable             | Current Smokers<br>(N=16664) | Ex-smokers<br>(N=4253) | Non-smokers<br>(N=16697) | p value |
|----------------------|------------------------------|------------------------|--------------------------|---------|
| Sudden cardiac death | 202/16664 (1.2%)             | 107/4253 (2.5%)        | 519/16697 (3.1%)         | 0.0387  |
| Cardiac shock        | 157/16664 (0.9%)             | 85/4253 (2.0%)         | 375/16697 (2.2%)         | 0.3203  |

|                          |                  |                |                  |        |
|--------------------------|------------------|----------------|------------------|--------|
| Heart failure            | 121/16664 (0.7%) | 65/4253 (1.5%) | 291/16697 (1.7%) | 0.3277 |
| Intracerebral hemorrhage | 4/16664 (0.0%)   | 1/4253 (0%)    | 3/16697 (0%)     | 0.8199 |
| Lung infection           | 15/16664 (0.1%)  | 10/4253 (0.2%) | 26/16697 (0.2%)  | 0.2833 |
| Ischemic stroke          | 3/16664 (0.0%)   | 2/4253 (0%)    | 7/16697 (0.0%)   | 0.8873 |
| Major bleeding           | 3/16664 (0.0%)   | 0/4253 (0%)    | 6/16697 (0.0%)   | 0.0989 |
| Others                   | 25/16664 (0.2%)  | 9/4253 (0.2%)  | 47/16697 (0.3%)  | 0.4176 |

More details are needed on how things were modelled – my guess is that a poor model or the index event bias highlighted above are the reasons for the persisting association.

Re: Thank you for your comments. We have added methods building the multivariable model as follows:

“The stepwise selection method was used to compare in-hospital mortality across the different groups. Baseline characteristics that significantly differed across the groups and those of clinical importance were included in the model. These variables were the same as those used for propensity matching. A p value <0.1 was used as the entry criterion and a p value <0.05 was used as the removal criterion.”

The authors mention "appropriate missing data methods" in the last line of the methods. Such as? What was actually done in this regard?

Re: Thank you for your comments. For most variables, less than 2.0% of the data were missing. We used simple imputation methods to deal with missing data<sup>23</sup> and missing data were imputed with median, or mode value of the available cases. According to the comments of the first reviewer, we revised our tables and presented our data as “counts/total numbers available (frequencies) ” for better transparency.

In the process of revising our manuscript, we found that for variables regarding drinking history (drinking history, drinking duration, drinking frequency, and drinking preference), more than 10% of the data were missing. So we removed these variables from table 1. We also described the methods used for dealing with missing data in subsection “statistical methods” as follows:

“For all variables included in our study, less than 2% of the data were missing. We used complete case analysis to deal with missing data<sup>23</sup>. Patients with missing data were excluded from analysis. We presented data as “counts/total numbers available (frequencies) ” for categorical variables. “

<b>Discussion</b> - Interpretation of our results: section.

Precision has a specific statistical meaning – be careful with wording, not sure you are referring here to precision as such here.

Re: Thank you for your comments. We have removed “precision” and revised this part as follows:

“Although we adjusted for many common confounders, our study was still subject to selection bias as discussed below in the Limitations subsection.”

<b>Throughout</b> - there needs to be some changes in the English for further clarity.



Re: Thank you for your comments. We have enlisted the help of Liwen Bianji, Edanz Group China. We appreciate the kind help of Ellen Knapp, PhD for editing our English text and added this acknowledgement in the subsection of "Acknowledgments" as follows:

"We thank Ellen Knapp, PhD, from Liwen Bianji, Edanz Group China ([www.liwenbianji.cn/ac](http://www.liwenbianji.cn/ac)), for editing the English text of a draft of this manuscript."

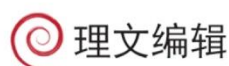

## Certificate of Editing

Edited provisional title  
Association between smoking and in-hospital mortality in patients  
with acute myocardial infarction: a prospective, multicenter,  
observational study

Client name and institution  
Chenxi Song, Rui Fu, Fuwai Hospital, National Center for Cardiovascular Diseases, Chinese Academy  
of Medical Sciences and Peking Union Medical College, Beijing, China

Date issued  
2019-05-30

Identification code  
60299

Certificate issued by  
Koichi Yamashita  
Managing Director and CEO

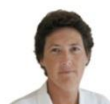

Expert Editor: Ellen Knapp  
2000 PhD Developmental  
Medicine/Biology, Pediatrics  
University of Auckland  
Medical Physiology, Paediatrics and  
Reproductive Medicine, Biochemistry and Cell  
Biology

[www.liwenbianji.cn](http://www.liwenbianji.cn)

While this certificate confirms the authors have used Edanz's editing services, we cannot guarantee that additional changes have not been made after our edits.

1. Peto R, Lopez AD, Boreham J, Thun M and Jr HC. Mortality from tobacco in developed countries: indirect estimation from national vital statistics. *Lancet*. 1992;339:1268-78.
2. Iversen B, Jacobsen BK and Løchen ML. Active and passive smoking and the risk of myocardial infarction in 24,968 men and women during 11 year of follow-up: the Tromsø Study. *European Journal of Epidemiology*. 2013;28:659-667.
3. Helmers C. Short and long-term prognostic indices in acute myocardial infarction. A study of 606 patients initially treated in a coronary care unit. *Acta medica Scandinavica Supplementum*. 1973;555:7-26.
4. Aune E, Roislien J, Mathisen M, Thelle DS and Otterstad JE. The "smoker's paradox" in patients with acute coronary syndrome: a systematic review. *BMC medicine*. 2011;9:97.
5. Kirtane AJ and Kelly CR. Clearing the air on the "smoker's paradox". *Journal of the American College of Cardiology*. 2015;65:1116-8.
6. Gurbel PA, Bliden KP, Logan DK, Kereiakes DJ, Lasseter KC, White A, Angiolillo DJ, Nolin TD, Maa JF, Bailey WL, Jakubowski JA, Ojeh CK, Jeong YH, Tantry US and Baker BA. The influence of smoking status on the pharmacokinetics and pharmacodynamics of clopidogrel and prasugrel: the PARADOX study. *Journal of the American College of Cardiology*. 2013;62:505-12.
7. Shen L, Peterson ED, Li S, Thomas L, Alexander K, Xian Y, Wang TY, Roe MT, He B and Shah BR. The association between smoking and long-term outcomes after non-ST-segment elevation myocardial infarction in older patients. *American Heart Journal*. 2013;166:1056.
8. Rakowski T, Siudak Z, Dziewierz A, Dubiel JS and Dudek D. Impact of smoking status on outcome in patients with ST-segment elevation myocardial infarction treated with primary percutaneous coronary intervention. *Journal of Thrombosis & Thrombolysis*. 2012;34:397-403.

9. Grundtvig M, Hagen TP, Amrud ES and Reikvam A. Mortality after myocardial infarction: impact of gender and smoking status. *European Journal of Epidemiology*. 2011;26:385-93.
10. Tan NS, Goodman SG, Cantor WJ, Tan MK, Yan RT, Bagnall AJ, Mehta SR, Fitchett D, Strauss BH and Yan AT. Comparison of the efficacy of pharmacoinvasive management for ST-segment elevation myocardial infarction in smokers versus non-smokers (from the Trial of Routine Angioplasty and Stenting After Fibrinolysis to Enhance Reperfusion in Acute Myocardial Infarct. *American Journal of Cardiology*. 2014;114:955.
11. Kenji G, Eugenia N, Lansky AJ, George D, Bernhard W, Helen P, Giulio G, Ran K, Claessen BE and Martin F. Impact of smoking on outcomes of patients with ST-segment elevation myocardial infarction (from the HORIZONS-AMI Trial). *American Journal of Cardiology*. 2011;108:1387-1394.
12. Howe M, Leidal A, Montgomery D and Jackson E. Role of cigarette smoking and gender in acute coronary syndrome events. *American Journal of Cardiology*. 2011;108:1382-6.
13. Allahwala UK, Murphy JC, Nelson GI and Bhindi R. Absence of a 'smoker's paradox' in field triaged ST-elevation myocardial infarction patients undergoing percutaneous coronary intervention. *Cardiovascular revascularization medicine : including molecular interventions*. 2013;14:213-7.
14. Bucholz EM, Beckman AL, Kiefe CI and Krumholz HM. Smoking status and life expectancy after acute myocardial infarction in the elderly. *Heart*. 2016;102:133.
15. Kang SH, Suh JW, Choi DJ, Chae IH, Cho GY, Youn TJ, Cho YS, Yoon CH, Oh IY and Cho MC. Cigarette Smoking is Paradoxically Associated With Low Mortality Risk After Acute Myocardial Infarction. *Nicotine & Tobacco Research Official Journal of the Society for Research on Nicotine & Tobacco*. 2013;15:1230-1238.
16. Elosua R, Vega G, Rohlfs I, Aldasoro E, Navarro C, Cabades A, Demissie S, Segura A, Fiol M and Morenoiribas C. Smoking and myocardial infarction case-fatality: hospital and population approach. *European journal of cardiovascular prevention and rehabilitation : official journal of the European Society of Cardiology, Working Groups on Epidemiology & Prevention and Cardiac Rehabilitation and Exercise Physiology*. 2007;14:561-7.
17. Canto JG, Kiefe CI, Rogers WJ, Peterson ED, Frederick PD, French WJ, Gibson CM, Jr PC, Ornato JP and Zalenski RJ. Atherosclerotic risk factors and their association with hospital mortality among patients with first myocardial infarction (from the National Registry of Myocardial Infarction). *American Journal of Cardiology*. 2012;110:1256.
18. Gupta T, Kolte D, Khera S, Harikrishnan P, Mujib M, Aronow WS, Jain D, Ahmed A, Cooper HA, Frishman WH, Bhatt DL, Fonarow GC and Panza JA. Smoker's Paradox in Patients With ST-Segment Elevation Myocardial Infarction Undergoing Primary Percutaneous Coronary Intervention. *Journal of the American Heart Association*. 2016;5.
19. Banack HR, Harper S and Kaufman JS. Accounting for Selection Bias in Studies of Acute Cardiac Events. *The Canadian journal of cardiology*. 2018;34:709-716.
20. Nguyen UDT, Zhang Y, Lu N, Louie-Gao Q, Niu J, Ogdie A, Gelfand JM, LaValley MP, Dubreuil M, Sparks JA, Karlson EW and Choi HK. Smoking paradox in the development of psoriatic arthritis among patients with psoriasis: a population-based study. *Annals of the rheumatic diseases*. 2018;77:119-123.
21. Zhang YJ, Iqbal J, van Klaveren D, Campos CM, Holmes DR, Kappetein AP, Morice MC, Banning AP, Grech ED, Bourantas CV, Onuma Y, Garcia-Garcia HM, Mack MJ, Colombo A, Mohr FW, Steyerberg EW and Serruys PW. Smoking is associated with adverse clinical outcomes in patients undergoing revascularization with PCI or CABG: the SYNTAX trial at 5-year follow-up. *Journal of the American College of Cardiology*. 2015;65:1107-15.
22. Ali SF, Smith EE, Reeves MJ, Zhao X, Xian Y, Hernandez AF, Bhatt DL, Fonarow GC and Schwamm LH. Smoking Paradox in Patients Hospitalized With Coronary Artery Disease or Acute Ischemic Stroke: Findings From Get With The Guidelines. *Circulation Cardiovascular quality and outcomes*. 2015;8:S73-80.
23. Little RJ, D'Agostino R, Cohen ML, Dickersin K, Emerson SS, Farrar JT, Frangakis C, Hogan JW, Molenberghs G, Murphy SA, Neaton JD, Rotnitzky A, Scharfstein D, Shih WJ, Siegel JP and

Stern H. The prevention and treatment of missing data in clinical trials. The New England journal of medicine. 2012;367:1355-60.

### VERSION 2 – REVIEW

|                        |                                                                                 |
|------------------------|---------------------------------------------------------------------------------|
| <b>REVIEWER</b>        | Radovanovic Dragana<br>AMIS Plus Data Center, University of Zurich, Switzerland |
| <b>REVIEW RETURNED</b> | 19-Jun-2019                                                                     |

|                         |                                                                                                                                                                                                                                                                                                                                                              |
|-------------------------|--------------------------------------------------------------------------------------------------------------------------------------------------------------------------------------------------------------------------------------------------------------------------------------------------------------------------------------------------------------|
| <b>GENERAL COMMENTS</b> | One remark:<br><br>If smoker's paradox is explained by confounding and smoking is not associated with favorable outcomes, physicians should disseminate this message to patients and help them quit smoking.<br>- This sentence is somehow confusing. We have to recommend to EVERY patient to quit smoking, independent of existing of the smoking paradox. |
|-------------------------|--------------------------------------------------------------------------------------------------------------------------------------------------------------------------------------------------------------------------------------------------------------------------------------------------------------------------------------------------------------|

### VERSION 2 – AUTHOR RESPONSE

One remark:

If smoker's paradox is explained by confounding and smoking is not associated with favorable outcomes, physicians should disseminate this message to patients and help them quit smoking.

- This sentence is somehow confusing. We have to recommend to EVERY patient to quit smoking, independent of existing of the smoking paradox.

Re: Thank you for your comments. We have clarify this point and revise the manuscript as follows:

“Examining the true effect of smoking on outcome among contemporary patients with AMI is important. One the one hand, the phenomenon of “smoking paradox” has a negative effect on quitting smoking in a public health perspective.”
