# Supplementary material for: Association between smoking and in-hospital mortality in patients with acute myocardial infarction: results from a prospective, multicentre, observational study in China
Source: PubMed Central journal article supplement — BMJ Open. 2019 Aug 30;9(8):e030252. doi: 10.1136/bmjopen-2019-030252 (PMC6720553; doi:10.1136/bmjopen-2019-030252), 2019-08-30
Supplement: bmjopen-2019-030252supp001.pdf [file bmjopen-2019-030252supp001.pdf]

Supplementary Table 1 Causes of mortality according to smoking status

| Variable                 | Current Smokers<br>(N=16664) | Ex-smokers<br>(N=4253) | Non-smokers<br>(N=16697) | p value |
|--------------------------|------------------------------|------------------------|--------------------------|---------|
| Sudden cardiac death     | 202/16664 (1.2%)             | 107/4253 (2.5%)        | 519/16697 (3.1%)         | 0.0387  |
| Cardiac shock            | 157/16664 (0.9%)             | 85/4253 (2.0%)         | 375/16697 (2.2%)         | 0.3203  |
| Heart failure            | 121/16664 (0.7%)             | 65/4253 (1.5%)         | 291/16697 (1.7%)         | 0.3277  |
| Intracerebral hemorrhage | 4/16664 (0.0%)               | 1/4253 (0%)            | 3/16697 (0%)             | 0.8199  |
| Lung infection           | 15/16664 (0.1%)              | 10/4253 (0.2%)         | 26/16697 (0.2%)          | 0.2833  |
| Ischemic stroke          | 3/16664 (0.0%)               | 2/4253 (0%)            | 7/16697 (0.0%)           | 0.8873  |
| Major bleeding           | 3/16664 (0.0%)               | 0/4253 (0%)            | 6/16697 (0.0%)           | 0.0989  |
| Others                   | 25/16664 (0.2%)              | 9/4253 (0.2%)          | 47/16697 (0.3%)          | 0.4176  |

**Supplementary Table 2 Baseline characteristics between current smokers vs. non-smokers  
(After matching)**

| Variable                          | Current Smokers<br>(N=8552) | Non-smokers<br>(N=8552) | p value | Standardized<br>difference |
|-----------------------------------|-----------------------------|-------------------------|---------|----------------------------|
| <b>Age</b>                        | 62.80 ± 11.53               | 62.84 ± 12.04           | 0.6983  | 0.0035                     |
| <b>Male</b>                       | 1048/8552 (87.7%)           | 7485/8552 (87.5%)       | 0.0995  | 0.0067                     |
| <b>BMI (Kg/m<sup>2</sup>)</b>     | 24.18 ± 2.88                | 24.17 ± 2.79            | 0.7580  | 0.0047                     |
| <b>ST-elevation on ECG</b>        | 71.1%                       | 71.5%                   | 0.5830  | 0.0083                     |
| SBP(mmHg)                         | 129.01 ± 25.75              | 128.90 ± 24.68          | 0.7767  | 0.0043                     |
| Heart rate(bpm)                   | 77.88 ± 18.55               | 77.61 ± 17.40           | 0.3279  | 0.0147                     |
| <b>Heart failure on admission</b> | 1208 ( 14.1%)               | 1144 (13.4%)            | 0.1448  | 0.0217                     |
| <b>Cardiac shock</b>              | 297 (3.5%)                  | 285 (3.3%)              | 0.6165  | 0.0077                     |
| <b>Killip classification</b>      |                             |                         | 0.6823  | 0.0080                     |
| <b>I</b>                          | 6564/8552 (76.8%)           | 6593/8552 (77.1%)       |         |                            |
| <b>II</b>                         | 1312/8552 (15.3%)           | 1301 /8552 (15.2%)      |         |                            |
| <b>III</b>                        | 341 /8552 (4.0%)            | 330/8552 (3.9%)         |         |                            |
| <b>IV</b>                         | 335 /8552 (3.9%)            | 328 /8552 (3.8%)        |         |                            |
| <b>Comorbidities</b>              |                             |                         |         |                            |
| <b>Hypertension</b>               | 4309/8552 (50.4%)           | 4256 /8552 (49.8%)      | 0.4066  | 0.0124                     |
| <b>Hyperlipidemia</b>             | 582/8552 (6.8%)             | 550 /8552 (6.4%)        | 0.3293  | 0.0151                     |
| <b>Diabetes</b>                   | 1629 /8552 (19.0%)          | 1575/8552 (18.4%)       | 0.2747  | 0.0162                     |
| <b>PVD</b>                        | 67 /8552 (0.8%)             | 45/8552 (0.5%)          | 0.0376  | 0.0319                     |
| <b>Heart failure</b>              | 146 /8552 (1.7%)            | 143 //8552 (1.7%)       | 0.8570  | 0.0027                     |
| <b>Stroke</b>                     | 762/8552 (8.9%)             | 751 /8552 (8.8%)        | 0.7671  | 0.0045                     |
| <b>COPD</b>                       | 150/8552 (1.8%)             | 150 /8552 (1.8%)        | 1.0000  | 0.0000                     |
| <b>Chronic kidney disease</b>     | 92 /8552 (1.1%)             | 89/8552 (1.0%)          | 0.8206  | 0.0034                     |
| Hb (g/L)                          | 137.32 ± 18.04              | 137.46 ± 18.20          | 0.5606  | 0.0076                     |
| Creatinine (mg/L)                 | 37.40 ± 0.59                | 37.40 ± 1.13            | 0.9837  | 0.0003                     |
| Primary PCI                       | 3778 /8552 (44.2%)          | 3858/8552 (42.3%)       | 0.1966  | 0.0188                     |
| P2Y12 inhibitors                  | 7880/8552 (92.1%)           | 7912/8552 (92.5%)       | 0.3576  | 0.0141                     |
| GRACE risk score                  | 161.33 ± 34.18              | 161.31 ± 34.22          | 0.9460  | 0.0008                     |
| <b>In-hospital mortality</b>      | 438/8552 (5.1%)             | 522/8552 (6.1%)         | 0.0045  |                            |

Data are presented as mean ± SD or frequencies; BMI: body mass index; ECG: electrocardiogram; SBP: systolic blood pressure; PVD: peripheral vascular disease; COPD: chronic obstructive pulmonary disease; Hb: hemoglobin; GRACE: the global registry of acute coronary events  
PVD: peripheral vascular disease; COPD: chronic obstructive pulmonary disease;

**Supplementary Table 3 Baseline characteristics between ex-smokers vs. non-smokers (After matching)**

| Variable                     | Ex-smokers<br>(N=4142) | Non-smokers<br>(N=4142) | p value | Standardized<br>difference |
|------------------------------|------------------------|-------------------------|---------|----------------------------|
| Age                          | 66.28 ± 11.49          | 66.02 ± 12.19           | 0.2242  | 0.0222                     |
| Male                         | 3887/4142 (93.8%)      | 3886 /4142(93.8%)       | 0.3173  | 0.0010                     |
| BMI (Kg/m <sup>2</sup> )     | 23.96 ± 2.83           | 24.02 ± 2.79            | 0.2900  | 0.0226                     |
| ST-elevation on ECG          | 2740 /4142 (66.2%)     | 2753 /4142 (66.5%)      | 0.4054  | 0.0175                     |
| SBP(mmHg)                    | 129.62 ± 25.19         | 129.58 ± 25.12          | 0.9422  | 0.0016                     |
| HR (bpm)                     | 79.66 ± 19.73          | 79.65 ± 18.75           | 0.9679  | 0.0009                     |
| Heart failure on admission   | 763 /4142 (18.4%)      | 775 /4142 (18.7%)       | 0.7158  | 0.0075                     |
| Cardiac shock                | 171/4142 (4.1%)        | 147/4142 (3.5%)         | 0.1701  | 0.0302                     |
| Killip classification        |                        |                         | 0.4505  | 0.0157                     |
| I                            | 2868/4142 (69.2%)      | 2898/4142 (70.0%)       |         |                            |
| II                           | 767/4142(18.5%)        | 764 /4142(18.4%)        |         |                            |
| III                          | 301/4142(7.3%)         | 270/4142(6.5%)          |         |                            |
| IV                           | 206/4142(5.0%)         | 210 /4142(5.1%)         |         |                            |
| <b>Comorbidities</b>         |                        |                         |         |                            |
| Hypertension                 | 2255/4142 (54.4%)      | 2223/4142 (53.7%)       | 0.4668  | 0.0155                     |
| Hyperlipidemia               | 339 /4142(8.2%)        | 309/4142 (7.5%)         | 0.2057  | 0.0270                     |
| Diabetes                     | 892/4142 (21.5%)       | 881/4142 (21.3%)        | 0.7664  | 0.0065                     |
| PVD                          | 46 /4142 (1.1%)        | 23/4142 (0.6%)          | 0.0050  | 0.0611                     |
| Heart failure                | 170 /4142 (4.1%)       | 147/4142 (3.5%)         | 0.1466  | 0.0289                     |
| Stroke                       | 532 /4142 (12.8%)      | 532/4142 (12.8%)        | 1.0000  | 0.0000                     |
| COPD                         | 143/4142 (3.5%)        | 124 /4142 (3.0%)        | 0.1294  | 0.0260                     |
| Chronic kidney disease       | 92 /4142 (2.2%)        | 89/4142 (2.1%)          | 0.8108  | 0.0050                     |
| Hb (g/L)                     | 135.50 ± 19.39         | 135.48 ± 19.08          | 0.9618  | 0.0010                     |
| Creatinine (mg/L)            | 37.40 ± 0.47           | 37.40 ± 1.14            | 0.8868  | 0.0031                     |
| Primary PCI                  | 1541/4142 (37.2%)      | 1575/4142 (38.0%)       | 0.4060  | 0.0169                     |
| P2Y12 inhibitors             | 3813/4142 (92.1%)      | 3842/4142 (92.8%)       | 0.2345  | 0.0264                     |
| GRACE risk score             | 170.68 ± 35.39         | 169.90 ± 36.56          | 0.2587  | 0.0215                     |
| <b>In-hospital mortality</b> | 292/4142 (7.0%)        | 307 /4142 (7.4%)        | 0.5198  |                            |

Data are presented as mean ± SD or frequencies; BMI: body mass index; ECG: electrocardiogram; SBP: systolic blood pressure; PVD: peripheral vascular disease; COPD: chronic obstructive pulmonary disease; Hb: hemoglobin; GRACE: the global registry of acute coronary events  
PVD: peripheral vascular disease; COPD: chronic obstructive pulmonary disease;
